# Supplementary material for: Does FDG PET-Based Radiomics Have an Added Value for Prediction of Overall Survival in Non-Small Cell Lung Cancer?
Source: MDPI journal article supplement (doi:10.3390/jcm13092613), 2024-04-29
Supplement: s1 [file s1]

Table S2. Clinical and demographic characteristics of Lung Cancer patients by dataset

| Variable                | Dataset                       |                           |                             | Statistic | p-value <sup>2</sup> |
|-------------------------|-------------------------------|---------------------------|-----------------------------|-----------|----------------------|
|                         | Overall, N = 320 <sup>1</sup> | Test, N = 64 <sup>1</sup> | Train, N = 256 <sup>1</sup> |           |                      |
| <b>Age</b>              | 72 (43, 92)                   | 71 (43, 84)               | 72 (45, 92)                 | -1.3      | 0.19                 |
| <b>Gender</b>           |                               |                           |                             | 0.15      | 0.70                 |
| <i>Female</i>           | 101 (32%)                     | 22 (34%)                  | 79 (31%)                    |           |                      |
| <i>Male</i>             | 219 (68%)                     | 42 (66%)                  | 177 (69%)                   |           |                      |
| <b>Smoking status</b>   |                               |                           |                             | 2.4       | 0.12                 |
| <i>Non smokers</i>      | 165 (52%)                     | 27 (42%)                  | 138 (54%)                   |           |                      |
| <i>Smokers</i>          | 155 (48%)                     | 37 (58%)                  | 118 (46%)                   |           |                      |
| <b>Histology</b>        |                               |                           |                             | 1.6       | 0.21                 |
| <i>ADC</i>              | 238 (74%)                     | 52 (81%)                  | 186 (73%)                   |           |                      |
| <i>SCC</i>              | 82 (26%)                      | 12 (19%)                  | 70 (27%)                    |           |                      |
| <b>Stage</b>            |                               |                           |                             | 3.0       | 0.40                 |
| <i>IA, IB</i>           | 119 (37%)                     | 25 (39%)                  | 94 (37%)                    |           |                      |
| <i>IIA, IIB</i>         | 35 (11%)                      | 5 (7.8%)                  | 30 (12%)                    |           |                      |
| <i>IIIA, IIIB, IIIC</i> | 77 (24%)                      | 12 (19%)                  | 65 (25%)                    |           |                      |
| <i>IVA, IVB</i>         | 89 (28%)                      | 22 (34%)                  | 67 (26%)                    |           |                      |
| <b>Treatment</b>        |                               |                           |                             |           | 0.49                 |
| <i>Combined</i>         | 141 (44%)                     | 23 (36%)                  | 118 (46%)                   |           |                      |
| <i>CTx</i>              | 66 (21%)                      | 16 (25%)                  | 50 (20%)                    |           |                      |
| <i>RTx</i>              | 10 (3.1%)                     | 2 (3.1%)                  | 8 (3.1%)                    |           |                      |
| <i>Sx</i>               | 103 (32%)                     | 23 (36%)                  | 80 (31%)                    |           |                      |
| <b>Outcome</b>          |                               |                           |                             | 0.01      | 0.91                 |
| <i>Alive</i>            | 123 (38%)                     | 25 (39%)                  | 98 (38%)                    |           |                      |
| <i>Deceased</i>         | 197 (62%)                     | 39 (61%)                  | 158 (62%)                   |           |                      |

<sup>1</sup> Median (Range); n (%)<sup>2</sup> Welch Two Sample t-test; Pearson's Chi-squared test; Fisher's exact test
