# Supplementary material for: Does FDG PET-Based Radiomics Have an Added Value for Prediction of Overall Survival in Non-Small Cell Lung Cancer?
Source: MDPI journal article supplement (doi:10.3390/jcm13092613), 2024-04-29
Supplement: s1 [file s1]

Table S1. Clinical and demographic characteristics by recruitment center.

| Variable                | Departments                 |                             | Statistic | p-value <sup>2</sup> |
|-------------------------|-----------------------------|-----------------------------|-----------|----------------------|
|                         | DPT#1, N = 218 <sup>1</sup> | DPT#2, N = 102 <sup>1</sup> |           |                      |
| <b>Age</b>              | 71 (45, 92)                 | 73 (43, 91)                 | 9,930     | 0.12                 |
| <b>Gender</b>           |                             |                             | 0.97      | 0.3                  |
| <i>Female</i>           | 65 (30%)                    | 36 (35%)                    |           |                      |
| <i>Male</i>             | 153 (70%)                   | 66 (65%)                    |           |                      |
| <b>Dead</b>             | 131 (60%)                   | 66 (65%)                    | 0.63      | 0.4                  |
| <b>Smoking status</b>   |                             |                             | 0.02      | 0.9                  |
| <i>Non smokers</i>      | 113 (52%)                   | 52 (51%)                    |           |                      |
| <i>Smokers</i>          | 105 (48%)                   | 50 (49%)                    |           |                      |
| <b>Disease stage</b>    |                             |                             | 0.37      | 0.5                  |
| <i>Advanced Disease</i> | 129 (59%)                   | 64 (63%)                    |           |                      |
| <i>Early Stage</i>      | 89 (41%)                    | 38 (37%)                    |           |                      |
| <b>Histology</b>        |                             |                             | 1.1       | 0.3                  |
| <i>ADC</i>              | 166 (76%)                   | 72 (71%)                    |           |                      |
| <i>SCC</i>              | 52 (24%)                    | 30 (29%)                    |           |                      |

<sup>1</sup> Median (Range); n (%)

<sup>2</sup> Wilcoxon rank sum test; Pearson's Chi-squared test
